# Supplementary material
Source: MDPI journal article supplement (https://www.mdpi.com/1424-8247/16/12/1665)
Supplement: s1 [file s1]

---

# Supplementary Materials: The anti-nociceptive effects of nicotine in humans: a systematic review and meta-analysis

Yujia Luo, Yating Yang, Carl Schneider and Thomas Balle

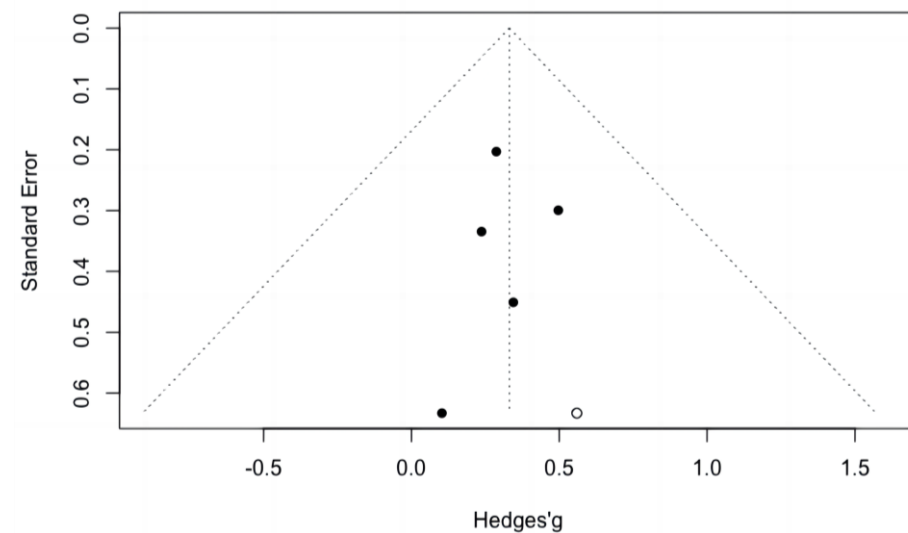

**Figure S1.** Funnel plots for publication bias removal. Each black dot represents a study. The X-axis represents the study effect size (hazard ratio) and the Y-axis represents the standard error of the hazard ratio. The dotted line indicates the overall risk estimate, and the black line indicates no intervention effect.
